# Supplementary material
Source: publisher figshare collection journal article supplement (https://acs.figshare.com/ndownloader/files/7211849)
Supplement: Supplementary file 1 [file 7211849]

## Supporting Information

### Dual-Metal Centered Zirconium–Organic Framework: A Metal-Affinity Probe for Highly Specific Interaction with Phosphopeptides

*Jiaxi Peng,<sup>ac</sup> Hongyan Zhang,<sup>ac</sup> Xin Li,<sup>ac</sup> Shengju Liu,<sup>ac</sup> Xingyun Zhao,<sup>ac</sup> Jing Wu,<sup>d</sup>*

*Xiaohui Kang,<sup>a</sup> Hongqiang Qin,<sup>a</sup> Zaifa Pan<sup>\*b</sup> and Ren'an Wu<sup>\*a</sup>*

<sup>a</sup> CAS Key Lab of Separation Sciences for Analytical Chemistry, National Chromatographic R&A Center, Dalian Institute of Chemical Physics, Chinese Academy of Sciences, Dalian, 116023, China <sup>b</sup> College of Chemical Engineering and Materials Science, Zhejiang University of Technology, Hangzhou 310014, China <sup>c</sup> University of Chinese Academy of Sciences, Beijing, 100049, China <sup>d</sup> Wenzhou Institute of Biomaterials and Engineering, Chinese Academy of Sciences, Wenzhou, 325000, China

\*E-mail: wurenan@dicp.ac.cn. Tel: +86-411-84379828

\*E-mail: panzaifa@zjut.edu.cn. Tel: +86-571-88320797

**Table S1.** Contact angles of UiO-66-NH<sub>2</sub>, UiO-66-NH-PO<sub>3</sub>, and DZMOF.

| Materials                 | Contact angle / degree | Images                                                                             |
|---------------------------|------------------------|------------------------------------------------------------------------------------|
| UiO-66-NH <sub>2</sub>    | 35.7                   |  |
| UiO-66-NH-PO <sub>3</sub> | 29.1                   |  |
| DZMOF                     | 20.2                   |  |

**Table S2.** ICP-OES results of UiO-66-NH<sub>2</sub>, UiO-66-NH-PO<sub>3</sub>, and DZMOF.

| Materials                 | Zr (wt%) |
|---------------------------|----------|
| UiO-66-NH <sub>2</sub>    | 22.2     |
| UiO-66-NH-PO <sub>3</sub> | 20.0     |
| DZMOF                     | 24.3     |

**Table S3.** Comparison of our proposed DZMOF to the reported MOF based affinity probes in the past three years.

| MOF Affinity Probes                          | Year of Publication | Sensitivity | Selectivity<br>$\beta$ -casein:BSA(n:n) | Ref      |
|----------------------------------------------|---------------------|-------------|-----------------------------------------|----------|
| Fe <sub>3</sub> O <sub>4</sub> @PDA@Zr-MOF   | 2014                | 1 fmol      | 1:500                                   | 1        |
| magG@PDA@Zr-MOFs                             | 2015                | 100 fmol    | 1:1000                                  | 2        |
| Fe <sub>3</sub> O <sub>4</sub> @MIL-100 (Fe) | 2015                | 0.5 pmol    | 1:500                                   | 3        |
| UiO-66 and UiO-67                            | 2015                | 15 fmol     | 1:200                                   | 4        |
| MIL-101(Cr)-UR <sub>2</sub>                  | 2016                | 20 fmol     | 1:200                                   | 5        |
| Fe <sub>3</sub> O <sub>4</sub> @PDA@Er(btc)  | 2016                | 4 fmol      | 1:500                                   | 6        |
| UiO-66-(OH) <sub>2</sub>                     | 2016                | 10 pmol     | 1:100                                   | 7        |
| DZMOF                                        | Proposed Probe      | 10 fmol     | 1:5000                                  | Our work |

**Table S4.** Identification of phosphopeptides from tryptic digests of  $\beta$ -casein by MALDI-TOF MS with enrichment of DZMOF.

| Protein         | Peak      | Amino Acid Sequence                   | No. of Phosphorylation Sites | [M+H] <sup>+</sup> |
|-----------------|-----------|---------------------------------------|------------------------------|--------------------|
| $\beta$ -casein | $\beta_1$ | FQ[pS]EEQQQTEDELQDK                   | 1                            | 2061.7798          |
|                 | $\beta_2$ | FQ[pS]EEQQQTEDELQDKIHFP               | 1                            | 2556.0596          |
|                 | $\beta_3$ | RELEELNVPGEIVE[pS]L[pS][pS][pS]EESITR | 4                            | 3122.2236          |

**Table S5.** Recovery of a standard phosphopeptide (GRRNpSIGK) treated by DZMOF. The recovery of standard phosphopeptide was calculated by the peak intensity ratio of eluted light isotope-labeled standard phosphopeptides to subsequently added heavy isotope-labeled standard phosphopeptides.

| Repeated Experiments | Intensity Ratio (L/H) | Average Recovery $\pm$ SD (% , n=5) |
|----------------------|-----------------------|-------------------------------------|
| 1                    | 95.6%                 | 91.4 $\pm$ 3.2                      |
| 2                    | 89.5%                 |                                     |
| 3                    | 93.6%                 |                                     |
| 4                    | 87.4%                 |                                     |
| 5                    | 90.8%                 |                                     |

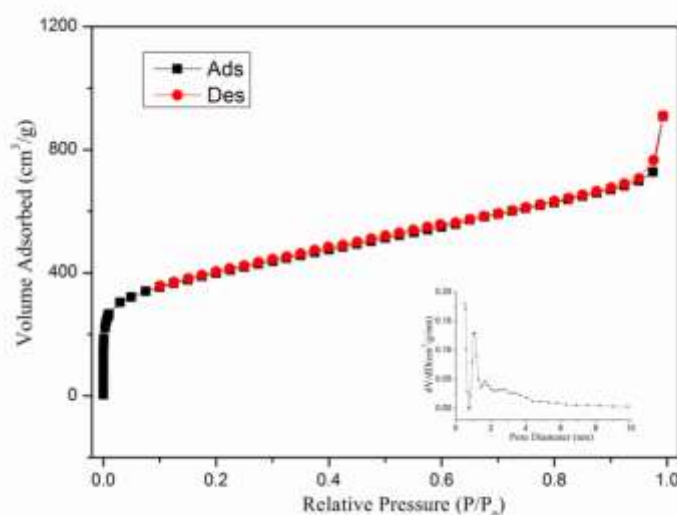

**Figure S1.** The nitrogen sorption/desorption isotherms of UiO-66-NH<sub>2</sub>. The inset shows the pore distribution obtained by DFT.

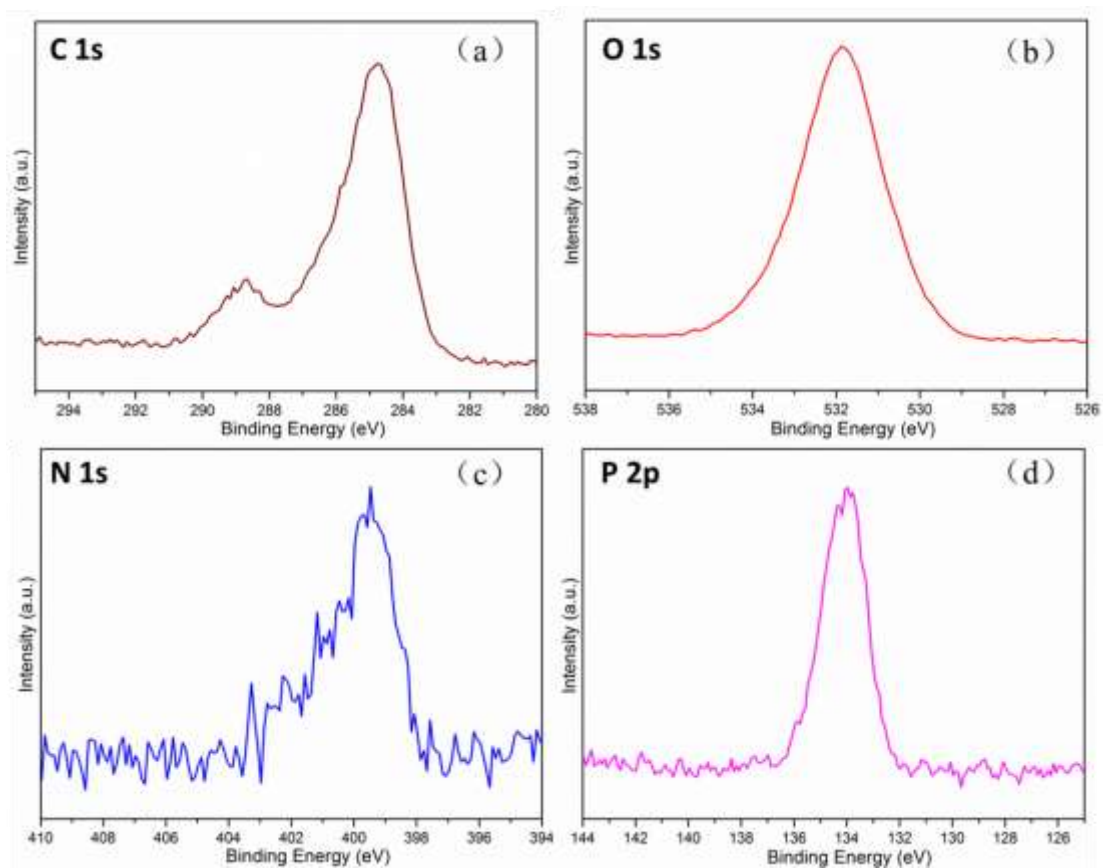

**Figure S2.** High-resolution XPS spectra of (a) C 1s, (b) O 2p, (c) N 1s, and (d) P 2p regions taken from DZMOF.

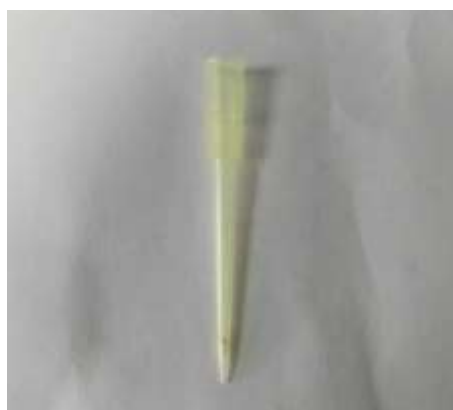

**Figure S3.** Digital photograph of a homemade pipette tip column.

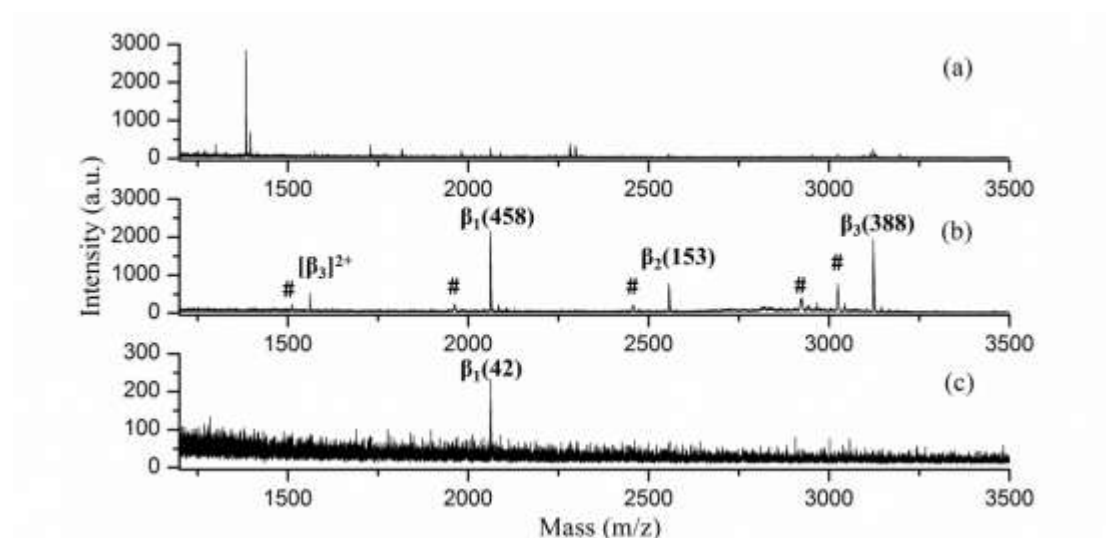

**Figure S4.** MALDI-TOF mass spectra of 10 pmol of  $\beta$ -casein tryptic digests (a) before and after enrichment by (b) DZMOF and (c) UiO-66-NH<sub>2</sub>. The numbers in parentheses represent the S/N of the peaks; “#” denoted dephosphorylated fragments.

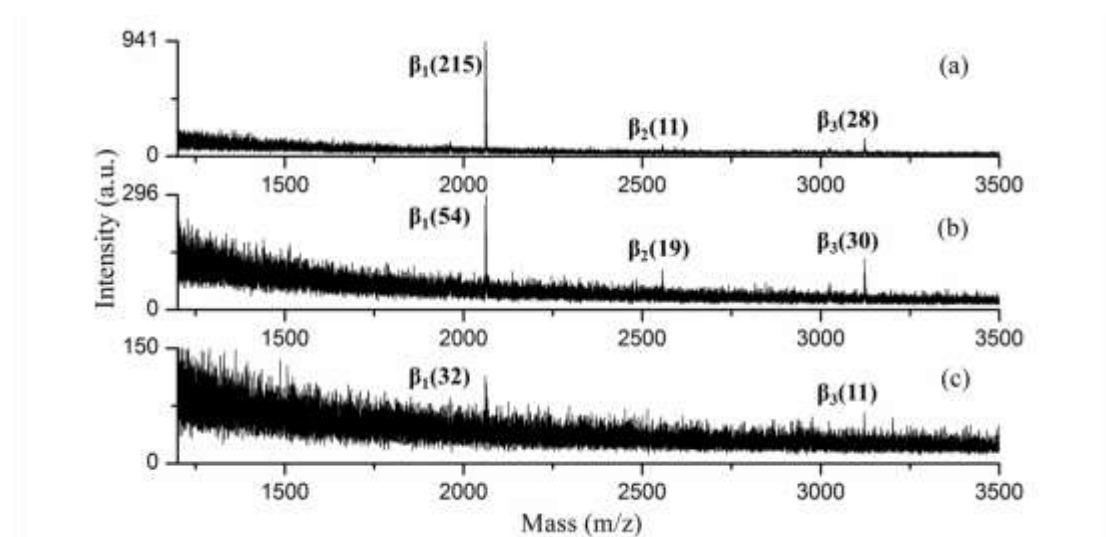

**Figure S5.** MALDI-TOF mass spectra of the tryptic digests of  $\beta$ -casein with a concentration of (a) 1.3 fmol/ $\mu$ L, (b) 0.67 fmol/ $\mu$ L, and (c) 0.07 fmol/ $\mu$ L, treated by DZMOF respectively. The numbers in parentheses represent the S/N of the peaks.

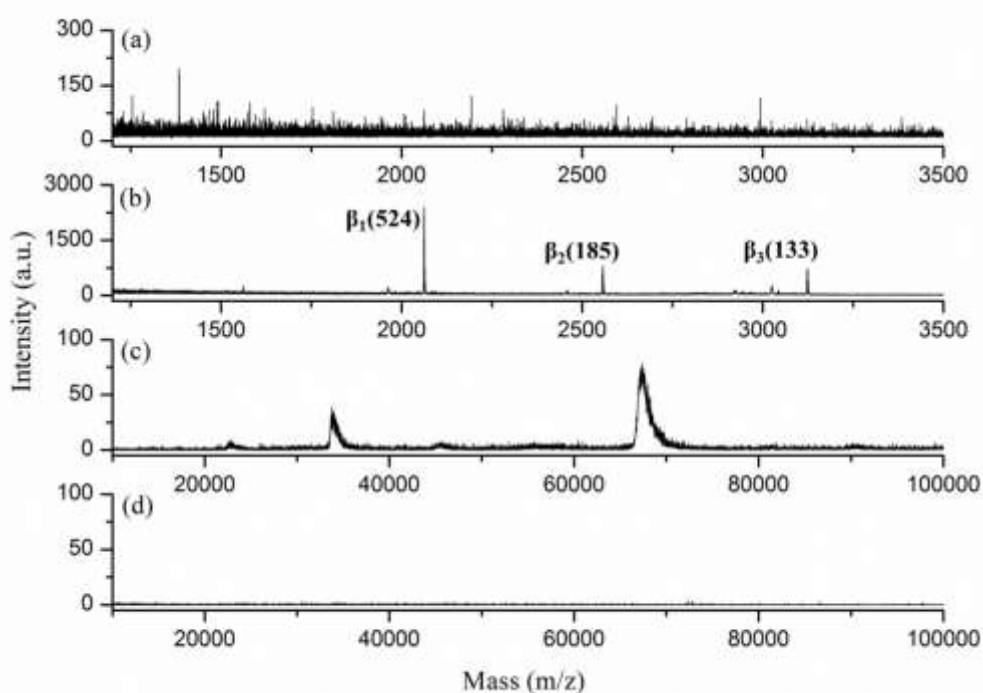

**Figure S6.** MALDI-TOF mass spectra of  $\beta$ -casein tryptic digests and BSA standard protein with a molar ratio of 1:1000 by direct analysis at (a) low molecular weight region, (c) high molecular weight region and enrichment with DZMOF at (b) low molecular weight region, (d) high molecular weight region. The numbers in parentheses represent the S/N of the peaks.

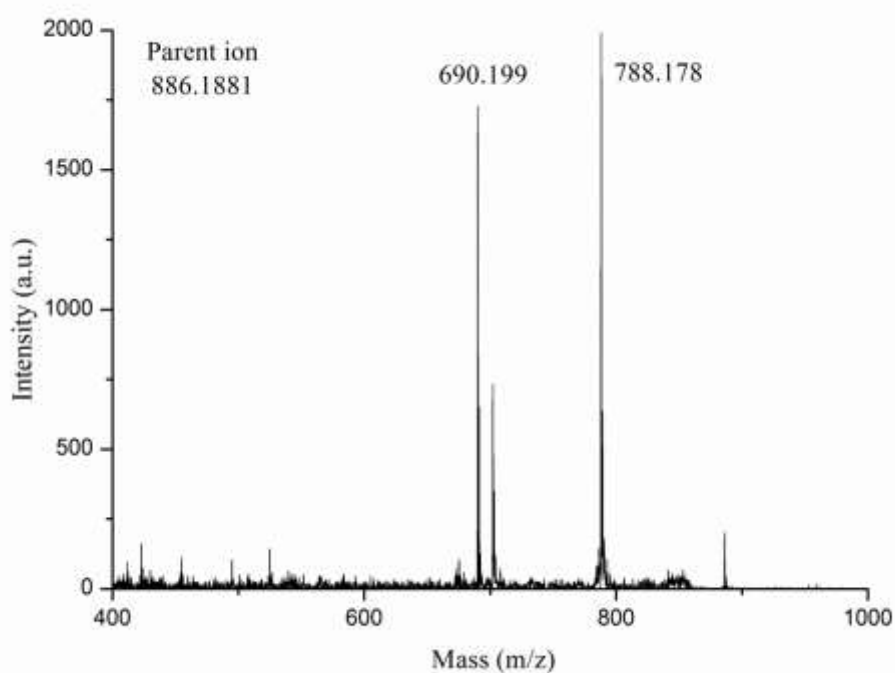

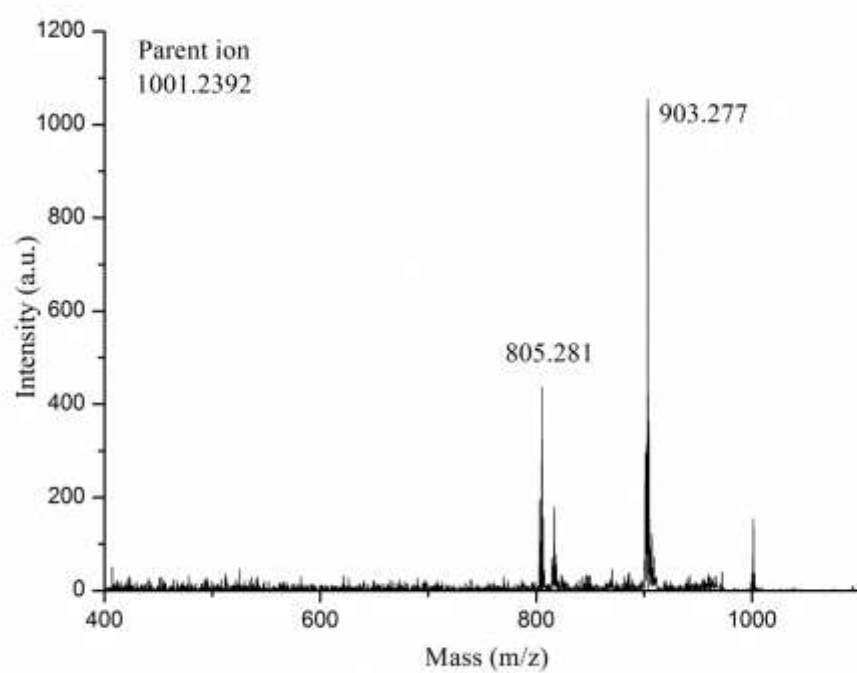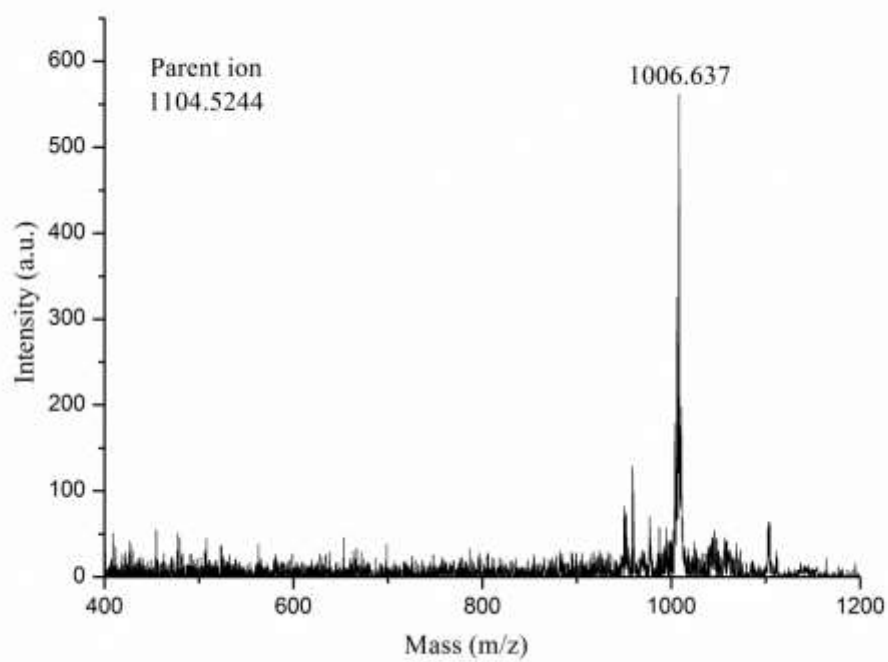

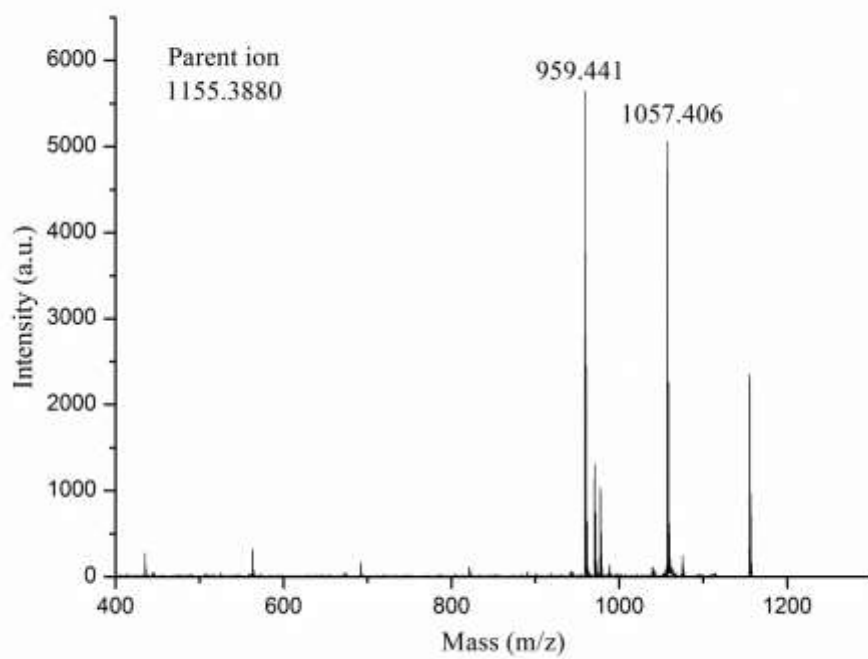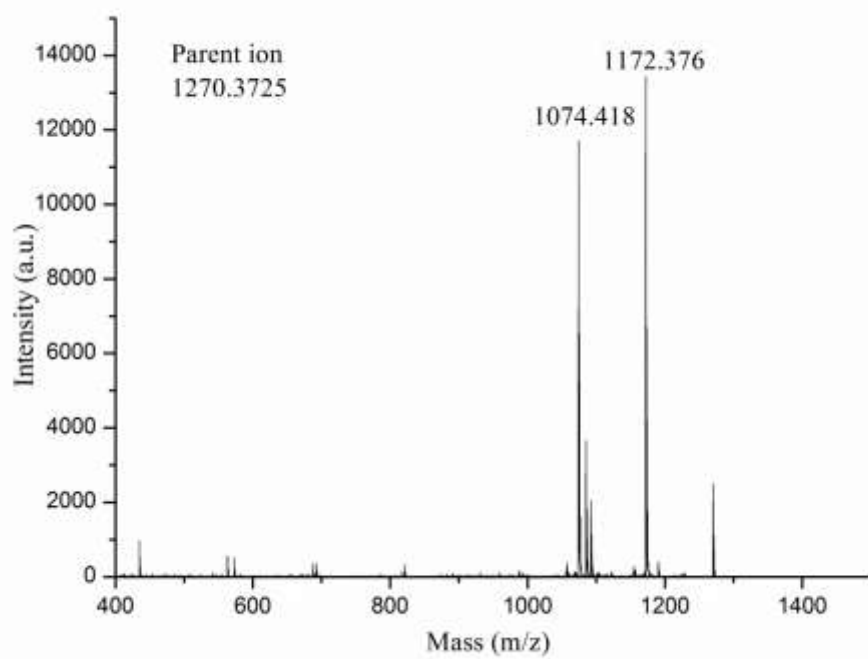



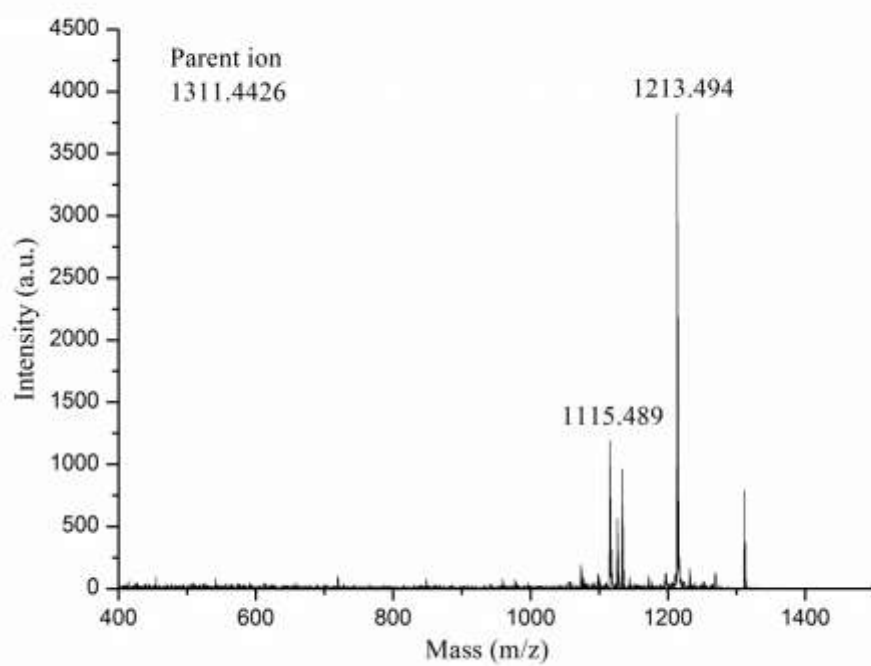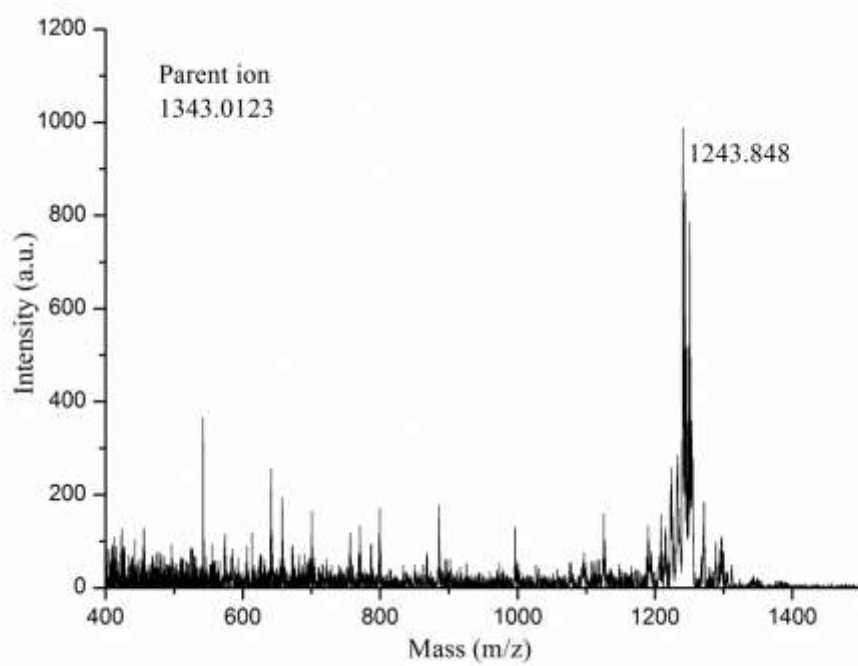

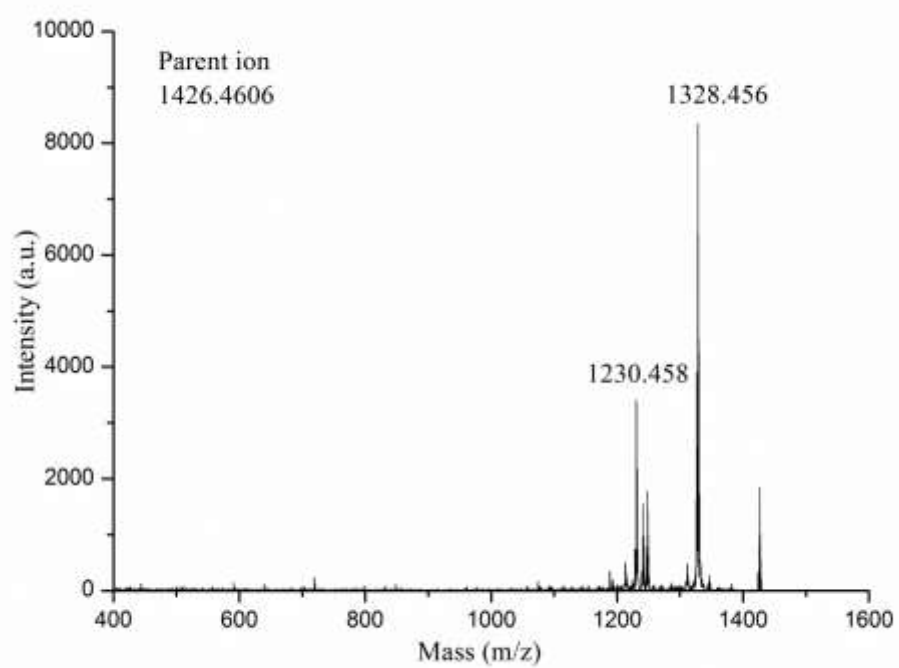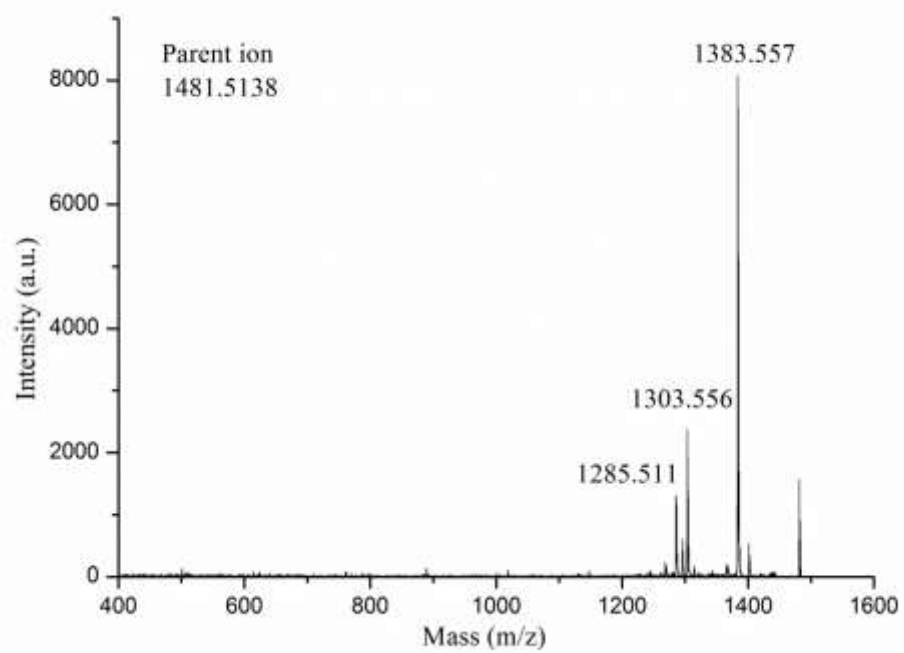

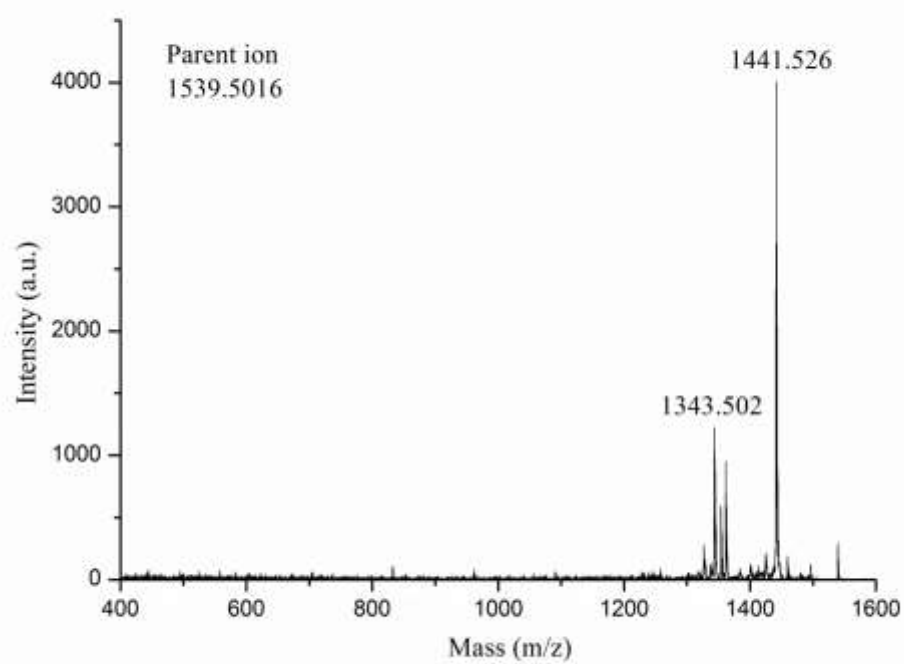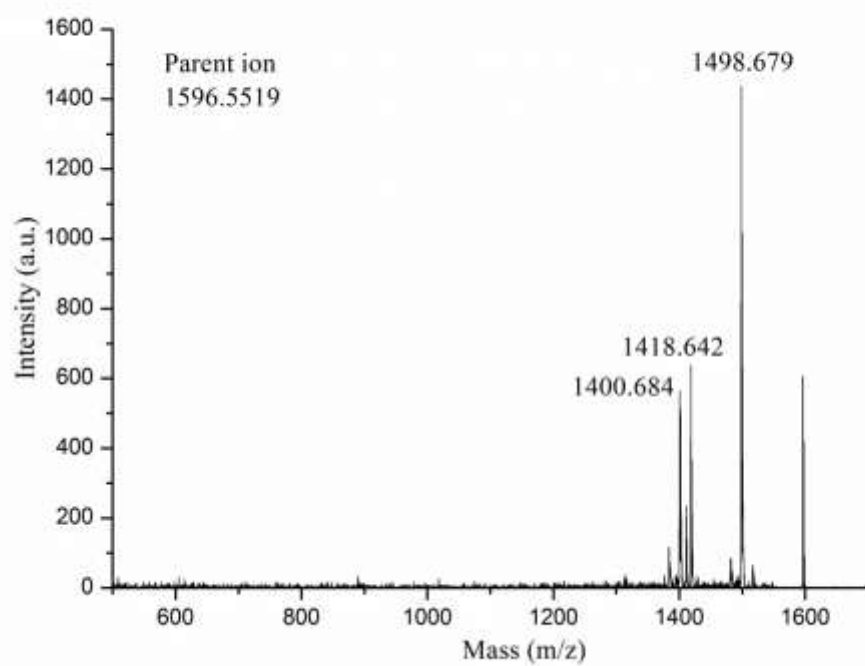

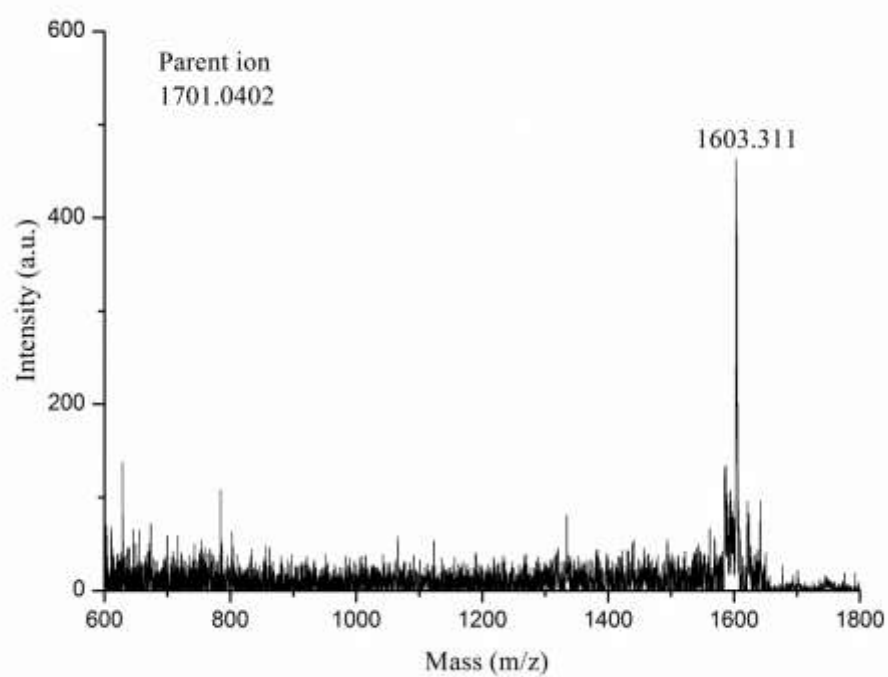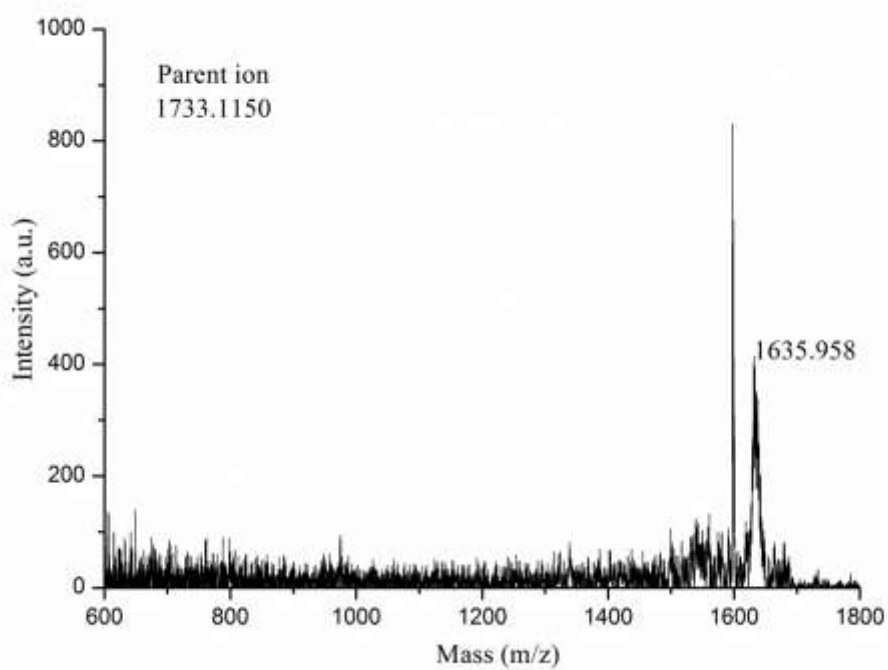

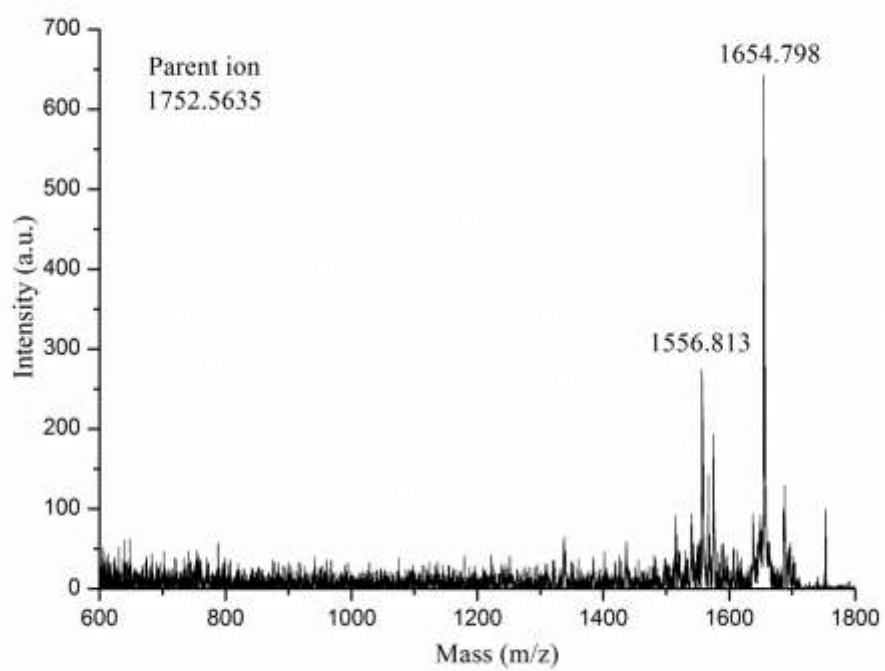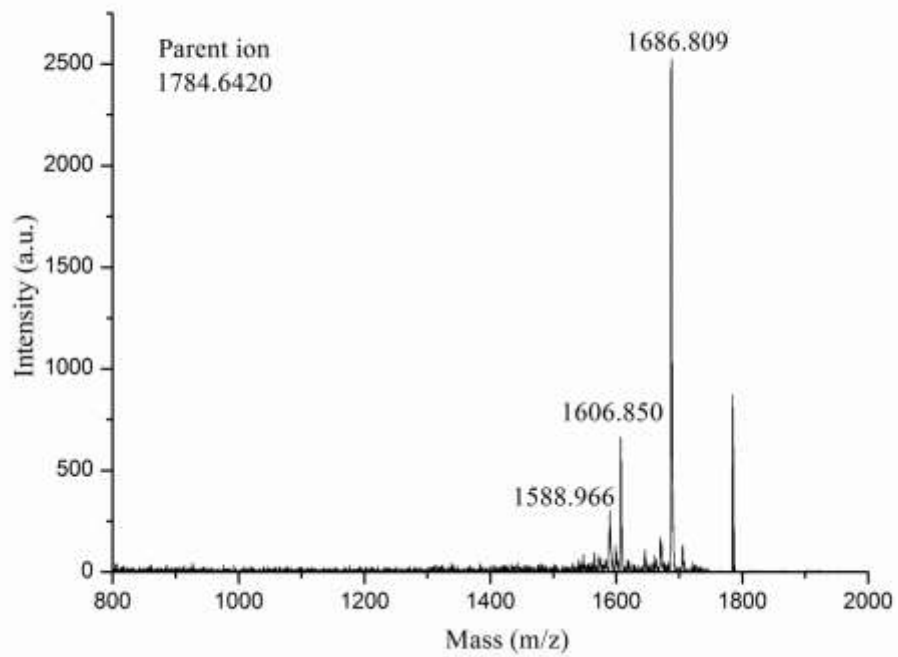

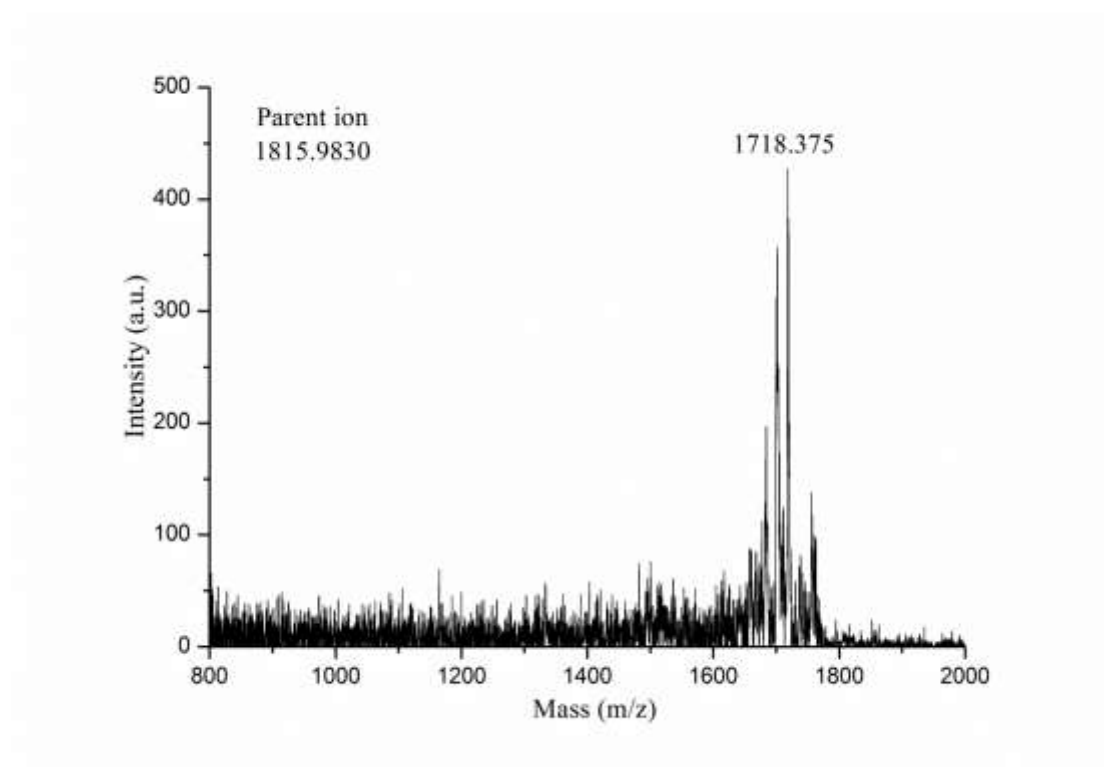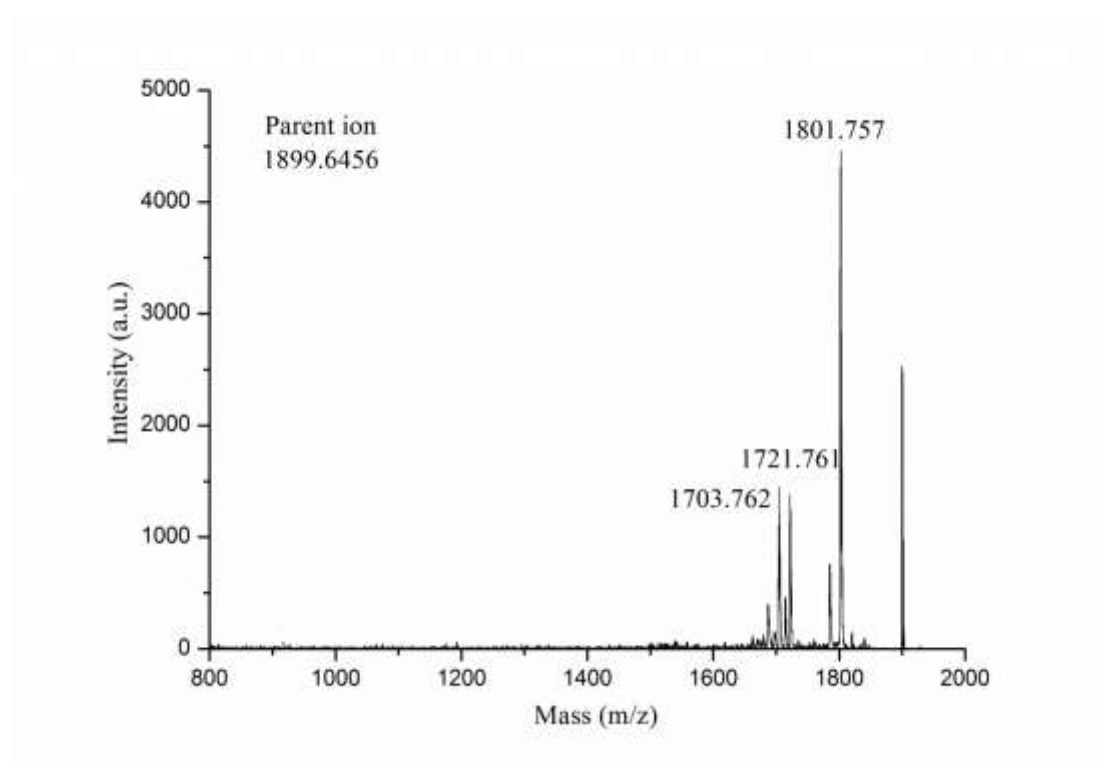

**Figure S7.** MALDI-TOF MS/MS spectra of phosphorylated peptides in human saliva after enrichment with DZMOF (dephosphorylated fragments about  $[M-98]^+$ ,  $[M-98-80]^+$  or  $[M-98\times 2]^+$ ).

#### References

(1) Zhao, M.; Deng, C.; Zhang, X. The Design and Synthesis of a Hydrophilic Core-Shell-Shell Structured Magnetic Metal-Organic Framework as a Novel

Immobilized Metal Ion Affinity Platform for Phosphoproteome Research. *Chem. Commun.* **2014**, 50, 6228-6231.

(2) Zhao, M.; Zhang, X.; Deng, C. Facile Synthesis of Hydrophilic Magnetic Graphene@Metal–Organic Framework for Highly Selective Enrichment of Phosphopeptides. *RSC Adv.* **2015**, 5, 35361-35364.

(3) Chen, Y.; Xiong, Z.; Peng, L.; Gan, Y.; Zhao, Y.; Shen, J.; Qian, J.; Zhang, L.; Zhang, W. Facile Preparation of Core-Shell Magnetic Metal-Organic Framework Nanoparticles for the Selective Capture of Phosphopeptides. *ACS Appl. Mater. Interfaces* **2015**, 7, 16338-16347.

(4) Zhu, X.; Gu, J.; Yang, J.; Wang, Z.; Li, Y.; Zhao, L.; Zhao, W.; Shi, J. Zr-Based Metal–Organic Frameworks for Specific and Size-Selective Enrichment of Phosphopeptides with Simultaneous Exclusion of Proteins. *J. Mater. Chem. B* **2015**, 3, 4242-4248.

(5) Yang, X.; Xia, Y. Urea-Modified Metal-Organic Framework of Type MIL-101(Cr) for the Preconcentration of Phosphorylated Peptides. *Microchim. Acta* **2016**, 183, 2235-2240.

(6) Xie, Y.; Deng, C. Highly Efficient Enrichment of Phosphopeptides by a Magnetic Lanthanide Metal-Organic Framework. *Talanta* **2016**, 159, 1-6.

(7) Chen, L.; Ou, J.; Wang, H.; Liu, Z.; Ye, M.; Zou, H. Tailor-Made Stable Zr(IV)-Based Metal-Organic Frameworks for Laser Desorption/Ionization Mass Spectrometry Analysis of Small Molecules and Simultaneous Enrichment of Phosphopeptides. *ACS Appl. Mater. Interfaces* **2016**, 8, 20292-20300.
